# Supplementary material for: Faster numeric static analyses with unconstrained variable oracles
Source: PeerJ journal article supplement (doi:10.7717/peerj-cs.3390), 2025-11-28
Supplement: experimental_evaluation_StaffSS.zip [file DRIVER-HAVOC-ANALYSIS-ACCURACY.xlsx]

## Sheet: pos-nonrel
Driver	Checks	TP	TN	FP	FN
block-rbd	764374258	759822663	844788	3603763	103044
firewire-firewire-ohci	55602401	55415903	126835	37137	22526
hid-hid-roccat-pyra	428434	424382	3764	252	36
hid-usbhid-usbhid	9511456	9449451	53194	4473	4338
hwmon-abituguru3	2002759	1935950	58916	7830	63
hwmon-w83781d	977637702	931294376	252023	45941078	150225
input-serio-serio_raw	41712	40112	1588	4	8
md-dm-raid	252484	249280	3156	2	46
media-i2c-cx25840-cx25840	231417932	148586185	77547	82743748	10452
media-pci-ttpci-dvb-ttpci	42120862	41602160	77208	425777	15717
media-usb-cpia2-cpia2	6995109	6933628	40695	13315	7471
media-usb-hdpvr-hdpvr	15356830	15277473	62088	16372	897
media-usb-tm6000-tm6000	27335155	27163914	81793	76639	12809
message-fusion-mptctl	12064	11454	584	4	22
mmc-host-sdhci	364550636	363030073	359688	1157202	3673
net-usb-r8152	23311975	22327862	145858	830905	7350
net-wireless-prism54-prism54	11362178	11291749	61177	6652	2600
net-wireless-rtlwifi-btcoexist-btcoexist	1012913063	1012266997	514111	0	131955
net-wireless-ti-wl12xx-wl12xx	84358559	84247649	94157	6006	10747
pcmcia-pcmcia_rsrc	2188484	2166698	21766	2	18
power-bq2415x_charger	108476645	93081578	132672	15159502	102893
scsi-3w-9xxx	96535958	96106676	139133	286588	3561
scsi-snic-snic	169390096	169144196	179461	63055	3384
staging-lustre-lnet-selftest-lnet_selftest	21525951	21393737	95977	4000	32237
staging-lustre-lustre-mdc-mdc	106072592	105692996	130667	226704	22225
usb-gadget-libcomposite	8415527	8368219	34179	12072	1057
usb-storage-uas	2678495	2657671	17486	2644	694
vfio-pci-vfio-pci	1088516	1071872	13407	1669	1568
net-vmxnet3-vmxnet3	38779292	38493907	187028	89777	8580
scsi-libfc-libfc	369511099	369155920	303300	31140	20739

## Sheet: def-nonrel
Driver	Checks	TP	TN	FP	FN
block-rbd	764374258	602933349	1557292	2891259	156992358
firewire-firewire-ohci	55602401	37375845	126954	37018	18062584
hid-hid-roccat-pyra	428434	245001	3348	668	179417
hid-usbhid-usbhid	9511456	6648417	50907	6760	2805372
hwmon-abituguru3	2002759	743239	56750	9996	1192774
hwmon-w83781d	977637702	608513258	16356236	29836865	322931343
input-serio-serio_raw	41712	23417	1457	135	16703
md-dm-raid	252484	89039	2840	318	160287
media-i2c-cx25840-cx25840	231417932	140214924	4744822	78076473	8381713
media-pci-ttpci-dvb-ttpci	42120862	23950569	253270	249715	17667308
media-usb-cpia2-cpia2	6995109	4407256	40343	13667	2533843
media-usb-hdpvr-hdpvr	15356830	6187935	59989	18471	9090435
media-usb-tm6000-tm6000	27335155	18467513	101068	57364	8709210
message-fusion-mptctl	12064	7491	526	62	3985
mmc-host-sdhci	364550636	232229480	762679	754211	130804266
net-usb-r8152	23311975	10859155	596536	380227	11476057
net-wireless-prism54-prism54	11362178	7349201	60760	7069	3945148
net-wireless-rtlwifi-btcoexist-btcoexist	1012913063	740351199	489294	24817	272047753
net-wireless-ti-wl12xx-wl12xx	84358559	44361023	90604	9559	39897373
pcmcia-pcmcia_rsrc	2188484	1312828	20425	1343	853888
power-bq2415x_charger	108476645	13905334	13252471	2039703	79279137
scsi-3w-9xxx	96535958	62268504	232671	193050	33841733
scsi-snic-snic	169390096	119766861	182991	59525	49380719
staging-lustre-lnet-selftest-lnet_selftest	21525951	17934669	90180	9797	3491305
staging-lustre-lustre-mdc-mdc	106072592	69021646	201373	155998	36693575
usb-gadget-libcomposite	8415527	4481003	36772	9479	3888273
usb-storage-uas	2678495	1521354	16484	3646	1137011
vfio-pci-vfio-pci	1088516	584656	12672	2404	488784
net-vmxnet3-vmxnet3	38779292	23215754	214124	62681	15286733
scsi-libfc-libfc	369511099	267744408	290921	43519	101432251

## Sheet: pos-rel
Driver	Checks	TP	TN	FP	FN
block-rbd	764374258	754990849	1227204	3703465	4452740
firewire-firewire-ohci	55602401	55326517	149333	41278	85273
hid-hid-roccat-pyra	428434	423357	4797	28	252
hid-usbhid-usbhid	9511456	9406949	74564	8715	21228
hwmon-abituguru3	2002759	1922528	66054	14059	118
hwmon-w83781d	977637702	931022052	624818	45943240	47592
input-serio-serio_raw	41712	39359	2140	12	201
md-dm-raid	252484	247903	4482	5	94
media-i2c-cx25840-cx25840	231417932	148576922	79283	82743808	17919
media-pci-ttpci-dvb-ttpci	42120862	41583624	89612	432038	15588
media-usb-cpia2-cpia2	6995109	6922708	49211	17758	5432
media-usb-hdpvr-hdpvr	15356830	15177661	69049	16896	93224
media-usb-tm6000-tm6000	27335155	27032300	111005	78164	113686
message-fusion-mptctl	12064	11393	657	4	10
mmc-host-sdhci	364550636	361128485	450687	1177508	1793956
net-usb-r8152	23311975	22305352	154161	841509	10953
net-wireless-prism54-prism54	11362178	11253287	90273	12227	6391
net-wireless-rtlwifi-btcoexist-btcoexist	1012913063	1012081144	699726	212	131981
net-wireless-ti-wl12xx-wl12xx	84358559	82544583	301876	6407	1505693
pcmcia-pcmcia_rsrc	2188484	2128211	40550	3514	16209
power-bq2415x_charger	108476645	93080743	193296	15159502	43104
scsi-3w-9xxx	96535958	95828874	275362	290369	141353
scsi-snic-snic	169390096	169042893	234662	74414	38127
staging-lustre-lnet-selftest-lnet_selftest	21525951	21351324	136238	9147	29242
staging-lustre-lustre-mdc-mdc	106072592	105591163	155115	249568	76746
usb-gadget-libcomposite	8415527	8239808	50685	21415	103619
usb-storage-uas	2678495	2643292	18390	4662	12151
vfio-pci-vfio-pci	1088516	1048110	31735	2465	6206
net-vmxnet3-vmxnet3	38779292	38196661	284592	112747	185292
scsi-libfc-libfc	369511099	369137156	316528	31716	25699

## Sheet: def-rel
Driver	Checks	TP	TN	FP	FN
block-rbd	764374258	503655720	2384003	2546666	255787869
firewire-firewire-ohci	55602401	30192355	152226	38385	25219435
hid-hid-roccat-pyra	428434	148769	4381	444	274840
hid-usbhid-usbhid	9511456	5063715	72905	10374	4364462
hwmon-abituguru3	2002759	674385	63889	16224	1248261
hwmon-w83781d	977637702	464159669	23917672	22650386	466909975
input-serio-serio_raw	41712	12561	2009	143	26999
md-dm-raid	252484	67038	4166	321	180959
media-i2c-cx25840-cx25840	231417932	137412506	6313017	76510074	11182335
media-pci-ttpci-dvb-ttpci	42120862	17855150	328363	193287	23744062
media-usb-cpia2-cpia2	6995109	4080058	50014	16955	2848082
media-usb-hdpvr-hdpvr	15356830	4923127	67124	18821	10347758
media-usb-tm6000-tm6000	27335155	13008131	144866	44303	14137855
message-fusion-mptctl	12064	4810	599	62	6593
mmc-host-sdhci	364550636	133262744	1167851	460344	229659697
net-usb-r8152	23311975	8185389	707906	287764	14130916
net-wireless-prism54-prism54	11362178	4584466	92182	10318	6675212
net-wireless-rtlwifi-btcoexist-btcoexist	1012913063	661237225	674909	25029	350975900
net-wireless-ti-wl12xx-wl12xx	84358559	28039040	299395	8888	56011236
pcmcia-pcmcia_rsrc	2188484	408820	40871	3193	1735600
power-bq2415x_charger	108476645	13140198	13439767	1913031	79983649
scsi-3w-9xxx	96535958	38167959	440810	124921	57802268
scsi-snic-snic	169390096	97539740	244149	64927	71541280
staging-lustre-lnet-selftest-lnet_selftest	21525951	17481725	130839	14546	3898841
staging-lustre-lustre-mdc-mdc	106072592	54263340	256433	148250	51404569
usb-gadget-libcomposite	8415527	2591682	55841	16259	5751745
usb-storage-uas	2678495	1150605	18257	4795	1504838
vfio-pci-vfio-pci	1088516	286591	31447	2753	767725
net-vmxnet3-vmxnet3	38779292	16575625	326758	70581	21806328
scsi-libfc-libfc	369511099	197328667	304149	44095	171834188
