# Supplementary material for: Faster numeric static analyses with unconstrained variable oracles
Source: PeerJ journal article supplement (doi:10.7717/peerj-cs.3390), 2025-11-28
Supplement: experimental_evaluation_StaffSS.zip [file DRIVER-HAVOC-TRANSFORM-ACCURACY.xlsx]

## Sheet: pos-nonrel
Driver	Checks	TP	TN	FP	FN
block-rbd	19499	16486	2546	2	465
firewire-firewire-ohci	5616	1993	2784	0	839
hid-hid-roccat-pyra	154	108	46	0	0
hid-usbhid-usbhid	3262	2337	853	0	72
hwmon-abituguru3	1689	202	1459	27	1
hwmon-w83781d	10492	3907	2069	2006	2510
input-serio-serio_raw	113	46	67	0	0
md-dm-raid	212	91	120	0	1
media-i2c-cx25840-cx25840	1281	920	232	36	93
media-pci-ttpci-dvb-ttpci	3164	1046	2080	2	36
media-usb-cpia2-cpia2	1295	277	926	2	90
media-usb-hdpvr-hdpvr	3883	1812	1991	1	79
media-usb-tm6000-tm6000	3336	2487	829	2	18
message-fusion-mptctl	15	8	7	0	0
mmc-host-sdhci	13827	11278	2523	0	26
net-usb-r8152	5282	2142	3012	28	100
net-wireless-prism54-prism54	1526	780	720	0	26
net-wireless-rtlwifi-btcoexist-btcoexist	7350	5878	1470	0	2
net-wireless-ti-wl12xx-wl12xx	92146	89590	2532	0	24
pcmcia-pcmcia_rsrc	954	584	370	0	0
power-bq2415x_charger	5224	296	2593	0	2335
scsi-3w-9xxx	4154	2935	1204	3	12
scsi-snic-snic	3244	2229	903	2	110
staging-lustre-lnet-selftest-lnet_selftest	2580	1207	1298	0	75
staging-lustre-lustre-mdc-mdc	3431	2356	962	12	101
usb-gadget-libcomposite	7302	6216	1012	30	44
usb-storage-uas	826	586	197	0	43
vfio-pci-vfio-pci	1049	516	506	4	23
net-vmxnet3-vmxnet3	7249	4118	3003	11	117
scsi-libfc-libfc	4046	3169	864	0	13

## Sheet: def-nonrel
Driver	Checks	TP	TN	FP	FN
block-rbd	19499	14809	2546	2	2142
firewire-firewire-ohci	5616	1874	2784	0	958
hid-hid-roccat-pyra	154	88	46	0	20
hid-usbhid-usbhid	3262	2258	853	0	151
hwmon-abituguru3	1689	198	1459	27	5
hwmon-w83781d	10492	3904	2069	2006	2513
input-serio-serio_raw	113	39	67	0	7
md-dm-raid	212	58	120	0	34
media-i2c-cx25840-cx25840	1281	872	232	36	141
media-pci-ttpci-dvb-ttpci	3164	934	2082	0	148
media-usb-cpia2-cpia2	1295	256	928	0	111
media-usb-hdpvr-hdpvr	3883	619	1991	1	1272
media-usb-tm6000-tm6000	3336	2218	829	2	287
message-fusion-mptctl	15	8	7	0	0
mmc-host-sdhci	13827	10922	2523	0	382
net-usb-r8152	5282	2127	3012	28	115
net-wireless-prism54-prism54	1526	770	720	0	36
net-wireless-rtlwifi-btcoexist-btcoexist	7350	5876	1470	0	4
net-wireless-ti-wl12xx-wl12xx	92146	75693	2532	0	13921
pcmcia-pcmcia_rsrc	954	482	370	0	102
power-bq2415x_charger	5224	291	2593	0	2340
scsi-3w-9xxx	4154	2269	1207	0	678
scsi-snic-snic	3244	1893	903	2	446
staging-lustre-lnet-selftest-lnet_selftest	2580	1139	1298	0	143
staging-lustre-lustre-mdc-mdc	3431	2171	968	6	286
usb-gadget-libcomposite	7302	6159	1012	30	101
usb-storage-uas	826	582	197	0	47
vfio-pci-vfio-pci	1049	472	506	4	67
net-vmxnet3-vmxnet3	7249	3929	3003	11	306
scsi-libfc-libfc	4046	2813	864	0	369

## Sheet: pos-rel
Driver	Checks	TP	TN	FP	FN
block-rbd	19499	1123	17474	40	862
firewire-firewire-ohci	5616	749	4273	51	543
hid-hid-roccat-pyra	154	0	154	0	0
hid-usbhid-usbhid	3262	550	2555	0	157
hwmon-abituguru3	1689	163	1521	0	5
hwmon-w83781d	10492	2605	7827	0	60
input-serio-serio_raw	113	6	105	0	2
md-dm-raid	212	37	174	0	1
media-i2c-cx25840-cx25840	1281	498	657	3	123
media-pci-ttpci-dvb-ttpci	3164	217	2753	48	146
media-usb-cpia2-cpia2	1295	110	1171	4	10
media-usb-hdpvr-hdpvr	3883	155	3702	1	25
media-usb-tm6000-tm6000	3336	199	2863	32	242
message-fusion-mptctl	15	0	15	0	0
mmc-host-sdhci	13827	2739	10364	113	611
net-usb-r8152	5282	1063	4087	42	90
net-wireless-prism54-prism54	1526	158	1292	30	46
net-wireless-rtlwifi-btcoexist-btcoexist	7350	5812	1533	2	3
net-wireless-ti-wl12xx-wl12xx	92146	942	90961	0	243
pcmcia-pcmcia_rsrc	954	30	868	0	56
power-bq2415x_charger	5224	242	4785	0	197
scsi-3w-9xxx	4154	1130	2968	0	56
scsi-snic-snic	3244	867	2168	6	203
staging-lustre-lnet-selftest-lnet_selftest	2580	754	1803	1	22
staging-lustre-lustre-mdc-mdc	3431	905	2268	112	146
usb-gadget-libcomposite	7302	100	7140	25	37
usb-storage-uas	826	182	546	9	89
vfio-pci-vfio-pci	1049	60	945	10	34
net-vmxnet3-vmxnet3	7249	431	6472	111	235
scsi-libfc-libfc	4046	65	3907	1	73

## Sheet: def-rel
Driver	Checks	TP	TN	FP	FN
block-rbd	19499	1007	17474	40	978
firewire-firewire-ohci	5616	696	4273	51	596
hid-hid-roccat-pyra	154	0	154	0	0
hid-usbhid-usbhid	3262	531	2555	0	176
hwmon-abituguru3	1689	163	1521	0	5
hwmon-w83781d	10492	2605	7827	0	60
input-serio-serio_raw	113	6	105	0	2
md-dm-raid	212	32	174	0	6
media-i2c-cx25840-cx25840	1281	497	657	3	124
media-pci-ttpci-dvb-ttpci	3164	217	2753	48	146
media-usb-cpia2-cpia2	1295	109	1171	4	11
media-usb-hdpvr-hdpvr	3883	154	3702	1	26
media-usb-tm6000-tm6000	3336	199	2863	32	242
message-fusion-mptctl	15	0	15	0	0
mmc-host-sdhci	13827	2501	10364	113	849
net-usb-r8152	5282	1063	4087	42	90
net-wireless-prism54-prism54	1526	158	1292	30	46
net-wireless-rtlwifi-btcoexist-btcoexist	7350	5811	1533	2	4
net-wireless-ti-wl12xx-wl12xx	92146	915	90961	0	270
pcmcia-pcmcia_rsrc	954	30	868	0	56
power-bq2415x_charger	5224	242	4785	0	197
scsi-3w-9xxx	4154	678	2968	0	508
scsi-snic-snic	3244	867	2168	6	203
staging-lustre-lnet-selftest-lnet_selftest	2580	752	1803	1	24
staging-lustre-lustre-mdc-mdc	3431	869	2268	112	182
usb-gadget-libcomposite	7302	97	7140	25	40
usb-storage-uas	826	182	547	8	89
vfio-pci-vfio-pci	1049	60	945	10	34
net-vmxnet3-vmxnet3	7249	431	6473	110	235
scsi-libfc-libfc	4046	64	3907	1	74
