# Supplementary material for: Faster numeric static analyses with unconstrained variable oracles
Source: PeerJ journal article supplement (doi:10.7717/peerj-cs.3390), 2025-11-28
Supplement: experimental_evaluation_StaffSS.zip [file DRIVER-NUM-HAVOC.xlsx]

## Sheet: pos-nonrel
Driver	Checks	Replacements	Time
block-rbd	19499	16488	40.7509
firewire-firewire-ohci	5616	1993	0.304684
hid-hid-roccat-pyra	154	108	0.00813901
hid-usbhid-usbhid	3262	2337	0.0501102
hwmon-abituguru3	1689	229	0.0249651
hwmon-w83781d	10492	5913	4.14298
input-serio-serio_raw	113	46	0.00278901
md-dm-raid	212	91	0.00438901
media-i2c-cx25840-cx25840	1281	956	0.109318
media-pci-ttpci-dvb-ttpci	3164	1048	0.162992
media-usb-cpia2-cpia2	1295	279	0.0506362
media-usb-hdpvr-hdpvr	3883	1813	0.164901
media-usb-tm6000-tm6000	3336	2489	0.149191
message-fusion-mptctl	15	8	0.001011
mmc-host-sdhci	13827	11278	8.44857
net-usb-r8152	5282	2170	0.183684
net-wireless-prism54-prism54	1526	780	0.128322
net-wireless-rtlwifi-btcoexist-btcoexist	7350	5878	2.28613
net-wireless-ti-wl12xx-wl12xx	92146	89590	0.405695
pcmcia-pcmcia_rsrc	954	584	0.0313401
power-bq2415x_charger	5224	296	0.272442
scsi-3w-9xxx	4154	2938	0.285637
scsi-snic-snic	3244	2231	0.487518
staging-lustre-lnet-selftest-lnet_selftest	2580	1207	0.140642
staging-lustre-lustre-mdc-mdc	3431	2368	0.30827
usb-gadget-libcomposite	7302	6246	0.0914071
usb-storage-uas	826	586	0.0183541
vfio-pci-vfio-pci	1049	520	0.0190591
net-vmxnet3-vmxnet3	7249	4129	0.293519
scsi-libfc-libfc	4046	3169	2.74477

## Sheet: def-nonrel
Driver	Checks	Replacements	Time
block-rbd	19499	14811	60.4219
firewire-firewire-ohci	5616	1874	0.449626
hid-hid-roccat-pyra	154	88	0.00754702
hid-usbhid-usbhid	3262	2258	0.0692662
hwmon-abituguru3	1689	225	0.0488242
hwmon-w83781d	10492	5910	7.11415
input-serio-serio_raw	113	39	0.00309701
md-dm-raid	212	58	0.00612701
media-i2c-cx25840-cx25840	1281	908	0.131691
media-pci-ttpci-dvb-ttpci	3164	934	0.270178
media-usb-cpia2-cpia2	1295	256	0.0680332
media-usb-hdpvr-hdpvr	3883	620	0.357592
media-usb-tm6000-tm6000	3336	2220	0.268895
message-fusion-mptctl	15	8	0.00126601
mmc-host-sdhci	13827	10922	12.5751
net-usb-r8152	5282	2155	0.252674
net-wireless-prism54-prism54	1526	770	0.144836
net-wireless-rtlwifi-btcoexist-btcoexist	7350	5876	4.51558
net-wireless-ti-wl12xx-wl12xx	92146	75693	0.642611
pcmcia-pcmcia_rsrc	954	482	0.0496101
power-bq2415x_charger	5224	291	0.351493
scsi-3w-9xxx	4154	2269	0.675794
scsi-snic-snic	3244	1895	0.968316
staging-lustre-lnet-selftest-lnet_selftest	2580	1139	0.256948
staging-lustre-lustre-mdc-mdc	3431	2177	0.58933
usb-gadget-libcomposite	7302	6189	0.167835
usb-storage-uas	826	582	0.0291571
vfio-pci-vfio-pci	1049	476	0.0189221
net-vmxnet3-vmxnet3	7249	3940	0.499922
scsi-libfc-libfc	4046	2813	4.95066

## Sheet: pos-rel
Driver	Checks	Replacements	Time
block-rbd	19499	1163	40.3163
firewire-firewire-ohci	5616	800	0.382401
hid-hid-roccat-pyra	154	0	0.00737301
hid-usbhid-usbhid	3262	550	0.0523022
hwmon-abituguru3	1689	163	0.0264341
hwmon-w83781d	10492	2605	3.78023
input-serio-serio_raw	113	6	0.00280401
md-dm-raid	212	37	0.00458201
media-i2c-cx25840-cx25840	1281	501	0.11793
media-pci-ttpci-dvb-ttpci	3164	265	0.157562
media-usb-cpia2-cpia2	1295	114	0.0469112
media-usb-hdpvr-hdpvr	3883	156	0.180168
media-usb-tm6000-tm6000	3336	231	0.149859
message-fusion-mptctl	15	0	0.001018
mmc-host-sdhci	13827	2852	7.3264
net-usb-r8152	5282	1105	0.178267
net-wireless-prism54-prism54	1526	188	0.103676
net-wireless-rtlwifi-btcoexist-btcoexist	7350	5814	2.3115
net-wireless-ti-wl12xx-wl12xx	92146	942	0.489506
pcmcia-pcmcia_rsrc	954	30	0.0314811
power-bq2415x_charger	5224	242	0.277742
scsi-3w-9xxx	4154	1130	0.322447
scsi-snic-snic	3244	873	0.504282
staging-lustre-lnet-selftest-lnet_selftest	2580	755	0.146082
staging-lustre-lustre-mdc-mdc	3431	1017	0.289844
usb-gadget-libcomposite	7302	125	0.106109
usb-storage-uas	826	191	0.0198311
vfio-pci-vfio-pci	1049	70	0.015269
net-vmxnet3-vmxnet3	7249	542	0.286209
scsi-libfc-libfc	4046	66	2.60982

## Sheet: def-rel
Driver	Checks	Replacements	Time
block-rbd	19499	1047	52.3695
firewire-firewire-ohci	5616	747	0.469801
hid-hid-roccat-pyra	154	0	0.00935002
hid-usbhid-usbhid	3262	531	0.0823273
hwmon-abituguru3	1689	163	0.0488862
hwmon-w83781d	10492	2605	6.70367
input-serio-serio_raw	113	6	0.00380301
md-dm-raid	212	32	0.00615701
media-i2c-cx25840-cx25840	1281	500	0.164086
media-pci-ttpci-dvb-ttpci	3164	265	0.315094
media-usb-cpia2-cpia2	1295	113	0.0817882
media-usb-hdpvr-hdpvr	3883	155	0.342055
media-usb-tm6000-tm6000	3336	231	0.211238
message-fusion-mptctl	15	0	0.000367001
mmc-host-sdhci	13827	2614	10.7218
net-usb-r8152	5282	1105	0.258279
net-wireless-prism54-prism54	1526	188	0.14618
net-wireless-rtlwifi-btcoexist-btcoexist	7350	5813	4.48743
net-wireless-ti-wl12xx-wl12xx	92146	915	0.726149
pcmcia-pcmcia_rsrc	954	30	0.0569601
power-bq2415x_charger	5224	242	0.34077
scsi-3w-9xxx	4154	678	0.968206
scsi-snic-snic	3244	873	0.974776
staging-lustre-lnet-selftest-lnet_selftest	2580	753	0.261241
staging-lustre-lustre-mdc-mdc	3431	981	0.651745
usb-gadget-libcomposite	7302	122	0.192846
usb-storage-uas	826	190	0.0293911
vfio-pci-vfio-pci	1049	70	0.0200011
net-vmxnet3-vmxnet3	7249	541	0.525058
scsi-libfc-libfc	4046	65	4.95213
